# Supplementary material for: Genome‐wide association mapping of the architecture of susceptibility to the root‐knot nematode Meloidogyne incognita in Arabidopsis thaliana
Source: PubMed Central journal article supplement (PMC6079644; doi:10.1111/nph.15034), 2018-02-22
Supplement: NPH-218-724-s001.pdf [file NPH-218-724-s001.pdf]

## **New Phytologist Supporting Information**

Article title: **Genome-wide association mapping of susceptibility of *Arabidopsis thaliana* to *Meloidogyne incognita***

Authors: Sonja Warmerdam, Mark G. Sterken, Casper van Schaik, Marian E. P. Oortwijn, Octavina C. A. Sukarta, Jose L. Lozano-Torres, Marcel Dicke, Johannes Helder, Jan E. Kammenga, Aska Goverse, Jaap Bakker, Geert Smant.

Article acceptance date: 08 January 2018

The following Supporting Information is available for this article:

**Fig. S1** Linkage disequilibrium (LD) between eight SNPs in *Arabidopsis* significantly associated with the number of egg masses of *M. incognita* per plant.

**Fig. S2** Haplotype specific susceptibility of *Arabidopsis* to *M. incognita*.

**Fig. S3** Expression of *BZR1:CFP* fusion protein under the control of the endogenous *BZR1* promoter sequence in roots of *Arabidopsis* seedlings infected with *M. incognita*.

**Fig. S4** Strongly reduced expression of *GSP1* and *FRNI1* in the homozygous knock-out *Arabidopsis* line *gsp1-1* and *frni1-1*, respectively.

**Table S1** Primers used for RT-PCR

**Table S2** Number of egg masses of *M. incognita* per plant on 340 natural inbred lines of *Arabidopsis thaliana* at 6 weeks after inoculation.

**Fig. S1** Linkage disequilibrium (LD) between eight SNPs in Arabidopsis significantly associated with the number of egg masses of *M. incognita* per plant. The LD is calculated as correlation between the eight SNPs, where a darker colour reflects higher correlations and thus a stronger LD. SNPs are indicated with the chromosome number and the location in base pairs. The legend identifies the number of counts for each correlation ( $r^2$ ).

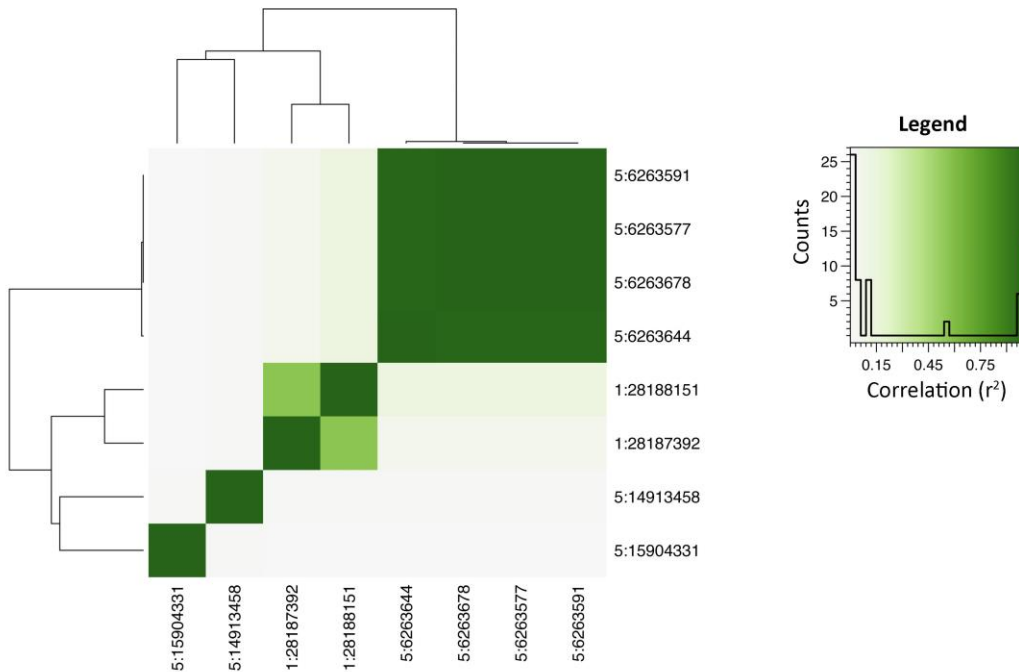

**Fig. S2** Haplotype specific susceptibility of Arabidopsis to *M. incognita*. Box plots of the number of egg masses of *M. incognita* per plant on Arabidopsis lines by haplotype at positions 28187392 and 28188151 on chromosome 1. SNP Ch1.28187392 and SNP Chr1. 28188151 are represented by the numbers 7392 and 8151, respectively. Each dot represents the average number of egg masses per plant of one accession harbouring either the haplotype CC, GC, CG, or GG.

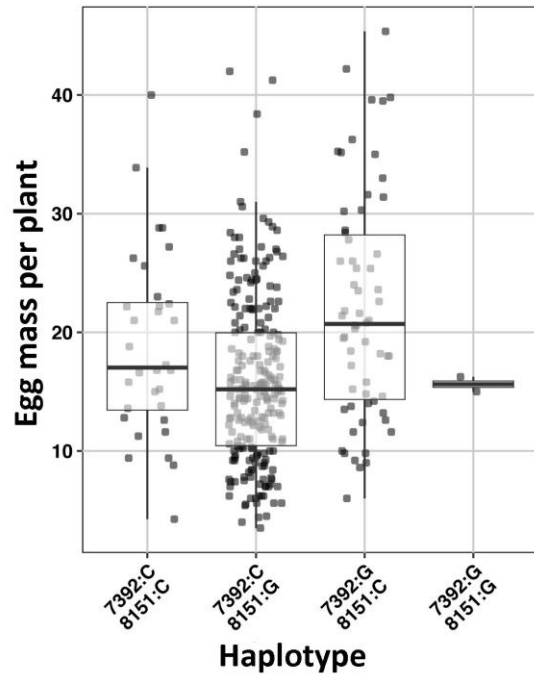

**Fig S3:** Expression of *BZR1:CFP* fusion protein under the control of the endogenous *BZR1* promoter sequence in roots of *Arabidopsis* seedlings infected with *M. incognita*. (a) Microscopic images of root tips of *BZR1:CFP* reporter lines uninfected (upper panel) and infected with *M. incognita* 3 days post inoculation. (b) Intensity levels of total CFP fluorescence based on grey value per pixel of the root area measured with ImageJ. Error bars represent standard error of the mean. Data was further analysed with ANOVA and post-hoc Tukey HSD ( $p < 0.05$ ,  $n > 10$ ).

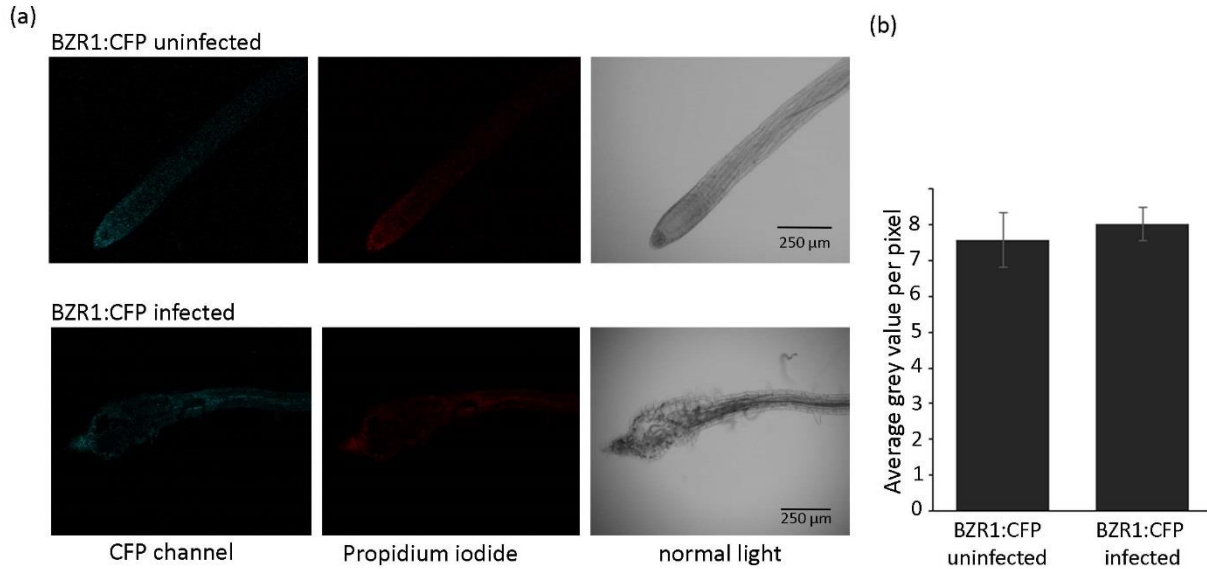

**Fig. S4** Strongly reduced expression of *GSP1* and *FRNI1* in the homozygous knock-out Arabidopsis line *gsp1-1* and *frni1-1*, respectively. (a) Allele specific PCR on genomic DNA isolated from the Arabidopsis mutant line *gsp1-1*. PCR amplification products using primer combinations for the wildtype *GSP1* allele and for the *gsp1-1* allele including the T-DNA insert. (b) Relative gene expression of *GSP1* in the T-DNA insertion mutant *gsp1-1* as compared to the wildtype Col-0 using quantitative RT-PCR. (c) Allele specific PCR on genomic DNA isolated from the Arabidopsis mutant line *frni1-1*. PCR amplification products using primer combinations for the wildtype *FRNI1* allele and for the *frni1-1* allele including the T-DNA insert. (d) Relative gene expression of *FRNI1* in the T-DNA insertion mutant *frni1-1* as compared to the wildtype Col-0 using quantitative RT-PCR. Error bars represent standard error of the mean.

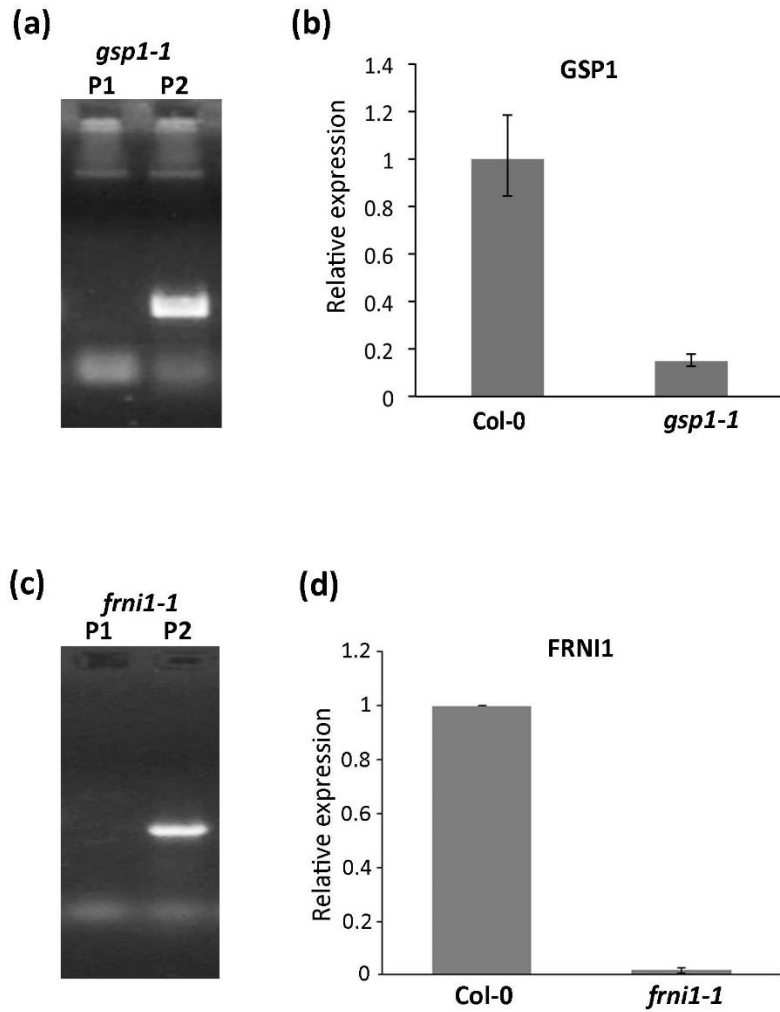

**Table S1:** Primers used for RT-PCR. Identifier mentions the corresponding gene with the forward and reverse primer sequence

| Identifier           | Forward                | Reverse                |
|----------------------|------------------------|------------------------|
| <b>Expression of</b> |                        |                        |
| GSP1                 | AACG TTCGT CAGTGAACACG | GATCGGGTCTGAATTAGGTGTG |
| BZR1                 | AACCCGAAACCGTTGCCTAA   | GGGTATGAAACTGGTGGCGA   |
| FRNI1                | AGCAACGGA ACTGAAACTGG  | ATGTGTACTGCATCAACAACG  |
| ELF1a                | GAGTACCCACCTTTGGGACG   | TTGGGTCCTTCTTGTCCACG   |
| PR1                  | ACGGGGAAA ACTTAGCCTGG  | TTGGCACATCCGAGTCTCAC   |
| PDF1.2               | CACCCTTATCTTCGCTGCTC   | GTTGCATGATCCATGTTTGG   |

|                     |                         |                       |
|---------------------|-------------------------|-----------------------|
| EXP6                | TGCCATTCTCCAATCTCT      | AACCAAGCCCAACATTGCC   |
| <b>T-DNA insert</b> |                         |                       |
| gsp1 wildtype       | TGCTAGGTGCAATTAATGTGTTG | AGCTTCGTTCTCCGGTTAAAC |
| gsp1-1 allele       | ATTTTGCCGATTTGGAAC      | AGCTTCGTTCTCCGGTTAAAC |
| frni1 wildtype      | GCAATTAGCACCTCTGCAGAC   | CTCTGAATCTCCAAGACGCTC |
| frni1-1 allele      | ATTTTGCCGATTTGGAAC      | CTCTGAATCTCCAAGACGCTC |

**Table S2** Number of egg masses of *M. incognita* per plant on 340 natural inbred lines of *Arabidopsis thaliana* at 6 weeks after inoculation. The numbers are average values, corresponding standard error of mean, and total number of individual plants (n).

| Genotype | Average number of egg masses | SE  | n  | Genotype | Average number of egg masses | SE  | n |
|----------|------------------------------|-----|----|----------|------------------------------|-----|---|
| CS28099  | 3.5                          | 1.0 | 4  | CS76155  | 15.8                         | 1.1 | 4 |
| CS76206  | 4.0                          | 0.7 | 5  | CS28200  | 15.8                         | 1.6 | 5 |
| CS76124  | 4.3                          | 1.3 | 4  | CS76174  | 15.8                         | 1.9 | 5 |
| CS76179  | 4.4                          | 1.3 | 5  | CS76192  | 15.8                         | 0.9 | 5 |
| CS76181  | 4.5                          | 1.2 | 4  | CS76289  | 15.8                         | 3.0 | 5 |
| CS28685  | 4.8                          | 1.1 | 5  | CS76112  | 15.9                         | 2.4 | 8 |
| CS76259  | 5.4                          | 1.7 | 5  | CS28345  | 15.9                         | 2.2 | 9 |
| CS28645  | 5.6                          | 1.7 | 5  | CS28800  | 16.0                         | 2.9 | 5 |
| CS76260  | 5.6                          | 1.5 | 5  | CS76107  | 16.0                         | 1.1 | 7 |
| CS76274  | 5.7                          | 3.2 | 3  | CS76166  | 16.0                         | 1.9 | 5 |
| CS28786  | 6.0                          | 1.4 | 5  | CS76281  | 16.0                         | 3.0 | 5 |
| CS76283  | 6.0                          | 2.1 | 3  | CS76143  | 16.2                         | 1.2 | 5 |
| CS76288  | 6.0                          | 1.1 | 5  | CS76242  | 16.2                         | 1.7 | 5 |
| CS28158  | 6.2                          | 1.0 | 5  | CS76239  | 16.3                         | 2.0 | 4 |
| CS76159  | 6.2                          | 1.0 | 5  | CS28091  | 16.4                         | 2.1 | 5 |
| CS76180  | 6.2                          | 1.9 | 5  | CS28193  | 16.6                         | 2.3 | 5 |
| CS76299  | 6.2                          | 1.1 | 5  | CS76213  | 16.6                         | 2.3 | 5 |
| CS28133  | 7.0                          | 1.0 | 5  | CS28141  | 16.8                         | 3.6 | 4 |
| CS76111  | 7.0                          | 2.3 | 4  | CS76120  | 16.8                         | 2.9 | 5 |
| CS76145  | 7.0                          | 1.1 | 5  | CS76147  | 16.8                         | 2.7 | 5 |
| CS76198  | 7.0                          | 2.8 | 5  | CS76177  | 16.8                         | 2.9 | 5 |
| CS76254  | 7.0                          | 2.3 | 10 | CS76216  | 16.8                         | 2.6 | 5 |

|         |      |     |   |         |      |     |    |
|---------|------|-----|---|---------|------|-----|----|
| CS76273 | 7.0  | 1.4 | 5 | CS76226 | 16.8 | 1.9 | 5  |
| CS28787 | 7.2  | 1.3 | 5 | CS28457 | 17.2 | 2.3 | 5  |
| CS76204 | 7.2  | 2.5 | 5 | CS76142 | 17.2 | 0.8 | 5  |
| CS28018 | 7.4  | 0.9 | 5 | CS28663 | 17.3 | 4.0 | 4  |
| CS76183 | 7.4  | 0.9 | 5 | CS76151 | 17.3 | 2.8 | 4  |
| CS28160 | 7.5  | 3.9 | 4 | CS76241 | 17.5 | 0.5 | 2  |
| CS28064 | 7.6  | 2.4 | 5 | CS28833 | 17.6 | 3.5 | 5  |
| CS76185 | 7.6  | 1.2 | 5 | CS76101 | 17.6 | 3.0 | 5  |
| CS76195 | 7.6  | 0.9 | 5 | CS28054 | 17.7 | 4.5 | 7  |
| CS28620 | 7.8  | 1.7 | 5 | CS76270 | 17.8 | 3.7 | 5  |
| CS76139 | 7.8  | 1.4 | 5 | CS28049 | 18.0 | 2.5 | 5  |
| CS76149 | 8.2  | 1.5 | 9 | CS28847 | 18.0 | 4.0 | 4  |
| CS28208 | 8.4  | 1.8 | 5 | CS76093 | 18.0 | 1.5 | 3  |
| CS76161 | 8.4  | 1.0 | 5 | CS76153 | 18.0 | 6.6 | 5  |
| CS76184 | 8.4  | 0.8 | 5 | CS76308 | 18.0 | 2.5 | 4  |
| CS76205 | 8.7  | 0.8 | 6 | CS28243 | 18.2 | 2.4 | 5  |
| CS76084 | 8.7  | 1.3 | 7 | CS76302 | 18.2 | 1.4 | 5  |
| CS28013 | 8.8  | 3.8 | 4 | CS28108 | 18.3 | 3.1 | 4  |
| CS76119 | 8.8  | 1.7 | 5 | CS28241 | 18.4 | 3.6 | 5  |
| CS28622 | 9.0  | 1.7 | 5 | CS28564 | 18.4 | 2.8 | 5  |
| CS28637 | 9.0  | 1.3 | 5 | CS28848 | 18.4 | 2.8 | 5  |
| CS76127 | 9.0  | 2.0 | 5 | CS76258 | 18.4 | 2.1 | 7  |
| CS28181 | 9.2  | 1.0 | 5 | CS76133 | 18.6 | 1.7 | 5  |
| CS76125 | 9.2  | 3.4 | 5 | CS76191 | 18.6 | 3.7 | 5  |
| CS76135 | 9.2  | 1.7 | 5 | CS76244 | 18.6 | 2.6 | 5  |
| CS76208 | 9.2  | 3.4 | 5 | CS76164 | 18.7 | 1.9 | 19 |
| CS76187 | 9.3  | 1.9 | 4 | CS76225 | 18.8 | 0.9 | 5  |
| CS76257 | 9.3  | 1.7 | 4 | CS28580 | 18.9 | 2.3 | 9  |
| CS76110 | 9.4  | 2.6 | 5 | CS76296 | 19.2 | 1.5 | 5  |
| CS76122 | 9.4  | 2.1 | 5 | CS28051 | 19.3 | 5.1 | 4  |
| CS76162 | 9.4  | 0.7 | 5 | CS76220 | 19.4 | 1.5 | 5  |
| CS76196 | 9.4  | 3.8 | 5 | CS76306 | 19.4 | 1.3 | 5  |
| CS76215 | 9.4  | 1.3 | 5 | CS28128 | 19.5 | 4.7 | 4  |
| CS76088 | 9.6  | 1.5 | 5 | CS28788 | 19.7 | 3.2 | 3  |
| CS76090 | 9.6  | 1.7 | 5 | CS28350 | 19.7 | 2.7 | 7  |
| CS76297 | 9.6  | 2.2 | 5 | CS28280 | 19.8 | 3.0 | 4  |
| CS28014 | 9.8  | 1.2 | 5 | CS28780 | 19.8 | 2.0 | 5  |
| CS28613 | 9.8  | 2.1 | 5 | CS76163 | 19.8 | 5.6 | 5  |
| CS28636 | 9.8  | 1.4 | 5 | CS28779 | 20.0 | 4.8 | 5  |
| CS76137 | 9.8  | 1.2 | 5 | CS76229 | 20.0 | 1.8 | 4  |
| CS28214 | 10.0 | 1.4 | 5 | CS76266 | 20.0 | 2.7 | 5  |
| CS28692 | 10.0 | 1.5 | 5 | CS76294 | 20.0 | 2.6 | 3  |
| CS28810 | 10.0 | 1.9 | 5 | CS76201 | 20.2 | 6.6 | 5  |
| CS76175 | 10.0 | 2.5 | 3 | CS76264 | 20.2 | 1.8 | 5  |
| CS76129 | 10.2 | 2.7 | 5 | CS76108 | 20.3 | 2.3 | 8  |

|         |      |     |     |         |      |     |    |
|---------|------|-----|-----|---------|------|-----|----|
| CS76136 | 10.2 | 1.8 | 5   | CS76200 | 20.4 | 2.1 | 8  |
| CS28007 | 10.3 | 2.9 | 4   | CS76089 | 20.4 | 4.2 | 5  |
| CS28097 | 10.3 | 1.2 | 3   | CS76233 | 20.6 | 1.7 | 7  |
| CS28795 | 10.4 | 2.0 | 5   | CS76170 | 20.6 | 1.5 | 5  |
| CS76134 | 10.4 | 1.0 | 5   | CS28729 | 20.8 | 1.5 | 5  |
| CS76256 | 10.4 | 2.6 | 5   | CS76169 | 20.8 | 1.7 | 5  |
| CS28635 | 10.6 | 0.7 | 5   | CS76286 | 20.8 | 1.7 | 5  |
| CS28236 | 10.8 | 1.7 | 5   | CS76303 | 21.0 | 4.3 | 5  |
| CS28633 | 10.8 | 1.9 | 5   | CS28063 | 21.3 | 5.1 | 4  |
| CS76096 | 11.0 | 2.0 | 7   | CS28614 | 21.3 | 2.6 | 12 |
| CS76210 | 11.0 | 1.5 | 5   | CS76172 | 21.3 | 4.6 | 6  |
| CS76271 | 11.0 | 2.7 | 5   | CS76140 | 21.4 | 2.7 | 5  |
| CS76275 | 11.0 | 3.4 | 5   | CS76188 | 21.4 | 3.2 | 5  |
| CS76285 | 11.0 | 3.0 | 5   | CS76173 | 21.5 | 4.4 | 6  |
| CS28804 | 11.2 | 1.6 | 10  | CS28090 | 21.6 | 1.8 | 5  |
| CS76098 | 11.2 | 1.5 | 5   | CS76217 | 21.8 | 2.8 | 4  |
| CS76304 | 11.3 | 3.7 | 4   | CS28759 | 21.8 | 3.1 | 5  |
| CS28142 | 11.6 | 1.1 | 5   | CS28573 | 21.9 | 2.5 | 10 |
| CS28202 | 11.6 | 3.1 | 5   | CS28809 | 22.0 | 3.5 | 5  |
| CS76123 | 11.6 | 1.7 | 5   | CS76144 | 22.0 | 3.0 | 8  |
| CS76176 | 11.6 | 1.3 | 5   | CS76156 | 22.0 | 1.8 | 10 |
| CS28277 | 11.8 | 3.5 | 5   | CS76171 | 22.0 | 2.8 | 5  |
| CS76160 | 11.8 | 1.5 | 5   | CS76253 | 22.0 | 2.4 | 5  |
| CS76168 | 11.8 | 1.7 | 5   | CS28490 | 22.1 | 1.9 | 7  |
| CS76103 | 12.0 | 1.6 | 4   | CS76100 | 22.2 | 3.6 | 6  |
| CS76113 | 12.2 | 0.4 | 455 | CS76202 | 22.2 | 6.7 | 5  |
| CS28725 | 12.2 | 1.9 | 5   | CS76218 | 22.2 | 3.7 | 5  |
| CS76209 | 12.2 | 3.8 | 5   | CS76269 | 22.2 | 2.1 | 5  |
| CS76276 | 12.2 | 3.4 | 5   | CS28823 | 22.4 | 1.3 | 5  |
| CS76221 | 12.3 | 1.9 | 4   | CS28407 | 22.5 | 1.2 | 4  |
| CS28282 | 12.4 | 1.7 | 5   | CS28459 | 22.6 | 2.0 | 10 |
| CS28628 | 12.4 | 1.1 | 5   | CS76261 | 22.6 | 1.7 | 5  |
| CS76250 | 12.4 | 3.1 | 5   | CS76189 | 22.8 | 2.3 | 5  |
| CS28651 | 12.5 | 1.3 | 4   | CS76118 | 23.0 | NA  | 1  |
| CS28713 | 12.6 | 2.2 | 5   | CS76263 | 23.4 | 4.2 | 5  |
| CS28734 | 12.6 | 0.7 | 5   | CS76247 | 23.5 | 3.0 | 4  |
| CS76095 | 12.6 | 3.2 | 5   | CS76234 | 23.6 | 4.4 | 5  |
| CS76148 | 12.6 | 0.4 | 5   | CS76301 | 23.7 | 0.9 | 3  |
| CS76152 | 12.8 | 0.9 | 4   | CS76193 | 23.8 | 3.5 | 12 |
| CS28163 | 12.8 | 0.7 | 5   | CS76240 | 24.0 | 2.0 | 5  |
| CS28252 | 12.8 | 1.2 | 5   | CS76298 | 24.0 | NA  | 1  |
| CS76158 | 12.8 | 1.4 | 5   | CS76105 | 24.1 | 4.5 | 8  |
| CS76182 | 12.8 | 2.1 | 5   | CS28812 | 24.2 | 4.8 | 5  |
| CS76243 | 12.8 | 1.9 | 5   | CS28758 | 24.4 | 2.9 | 5  |
| CS76115 | 12.9 | 2.1 | 8   | CS76086 | 24.4 | 6.3 | 5  |



|         |      |     |    |         |      |     |    |
|---------|------|-----|----|---------|------|-----|----|
| CS76138 | 13.0 | 1.8 | 5  | CS28279 | 24.5 | 5.7 | 4  |
| CS76272 | 13.0 | 1.1 | 5  | CS28808 | 24.8 | 3.2 | 5  |
| CS28135 | 13.2 | 3.4 | 5  | CS76292 | 25.0 | 0.3 | 5  |
| CS28165 | 13.2 | 1.9 | 5  | CS28513 | 25.4 | 1.8 | 8  |
| CS76087 | 13.2 | 1.4 | 5  | CS76295 | 25.4 | 2.9 | 5  |
| CS76228 | 13.2 | 1.4 | 5  | CS28420 | 25.6 | 3.2 | 5  |
| CS76248 | 13.2 | 1.1 | 5  | CS28336 | 25.7 | 4.8 | 3  |
| CS76223 | 13.4 | 3.0 | 5  | CS28344 | 26.0 | 6.7 | 5  |
| CS76128 | 13.5 | 1.3 | 8  | CS28720 | 26.0 | 1.8 | 5  |
| CS28640 | 13.6 | 4.1 | 9  | CS28814 | 26.0 | 5.9 | 5  |
| CS28626 | 13.6 | 1.6 | 5  | CS76214 | 26.0 | 2.3 | 5  |
| CS76094 | 13.6 | 3.5 | 5  | CS76222 | 26.0 | 3.4 | 5  |
| CS76121 | 13.6 | 3.7 | 5  | CS76255 | 26.0 | 7.3 | 5  |
| CS76126 | 13.8 | 1.5 | 13 | CS76232 | 26.3 | 1.3 | 4  |
| CS28274 | 13.8 | 0.6 | 5  | CS76280 | 26.3 | 3.4 | 4  |
| CS76099 | 13.8 | 4.1 | 5  | CS76293 | 26.3 | 3.3 | 4  |
| CS28201 | 14.0 | 1.3 | 5  | CS76284 | 26.3 | 5.8 | 3  |
| CS76106 | 14.0 | 4.6 | 4  | CS28760 | 26.4 | 5.4 | 5  |
| CS76132 | 14.0 | 2.9 | 5  | CS28743 | 26.6 | 3.0 | 5  |
| CS76277 | 14.0 | 1.7 | 4  | CS76238 | 26.6 | 3.5 | 5  |
| CS76097 | 14.1 | 4.3 | 7  | CS76212 | 26.8 | 3.4 | 5  |
| CS28650 | 14.2 | 1.6 | 5  | CS76287 | 26.8 | 5.7 | 5  |
| CS28724 | 14.2 | 3.4 | 5  | CS76092 | 27.0 | 5.0 | 5  |
| CS28268 | 14.4 | 1.4 | 5  | CS76207 | 27.0 | NA  | 1  |
| CS28343 | 14.4 | 3.2 | 5  | CS76235 | 27.0 | 6.3 | 5  |
| CS28583 | 14.4 | 3.1 | 5  | CS28394 | 27.2 | 4.6 | 5  |
| CS28631 | 14.4 | 1.8 | 5  | CS76219 | 27.2 | 3.5 | 5  |
| CS76267 | 14.4 | 1.4 | 5  | CS28369 | 27.9 | 1.8 | 9  |
| CS28217 | 14.5 | 2.2 | 4  | CS76085 | 28.0 | 5.0 | 5  |
| CS28017 | 14.6 | 3.2 | 5  | CS76282 | 28.0 | 4.4 | 5  |
| CS76109 | 14.6 | 2.7 | 5  | CS28495 | 28.4 | 3.8 | 5  |
| CS76291 | 14.6 | 2.9 | 5  | CS28750 | 28.4 | 2.9 | 5  |
| CS76083 | 14.8 | 2.3 | 5  | CS76167 | 28.6 | 1.9 | 5  |
| CS76245 | 14.8 | 2.7 | 5  | CS76231 | 28.6 | 1.1 | 5  |
| CS76279 | 14.8 | 2.0 | 5  | CS76224 | 28.8 | 5.1 | 5  |
| CS28595 | 15.0 | 3.4 | 4  | CS76265 | 28.8 | 4.4 | 5  |
| CS28739 | 15.0 | 1.9 | 5  | CS28587 | 28.9 | 1.7 | 10 |
| CS76146 | 15.0 | 1.9 | 5  | CS28332 | 29.7 | 3.8 | 3  |
| CS76199 | 15.0 | 1.7 | 4  | CS76249 | 30.2 | 3.3 | 5  |
| CS76230 | 15.0 | 4.0 | 5  | CS76236 | 30.6 | 3.8 | 5  |
| CS76104 | 15.1 | 2.2 | 8  | CS76251 | 31.4 | 4.8 | 5  |
| CS28527 | 15.2 | 1.4 | 10 | CS28395 | 31.6 | 4.6 | 5  |
| CS28610 | 15.2 | 3.0 | 5  | CS76252 | 32.0 | NA  | 1  |
| CS28822 | 15.2 | 4.6 | 5  | CS28326 | 33.0 | 3.1 | 4  |
| CS76141 | 15.2 | 1.7 | 5  | CS76307 | 33.9 | 3.6 | 8  |

|         |      |     |    |         |      |     |    |
|---------|------|-----|----|---------|------|-----|----|
| CS76165 | 15.2 | 2.4 | 5  | CS76227 | 35.0 | 2.5 | 5  |
| CS76278 | 15.2 | 2.8 | 5  | CS76116 | 35.2 | 3.5 | 25 |
| CS76305 | 15.2 | 1.8 | 5  | CS76211 | 35.2 | 3.6 | 5  |
| CS76154 | 15.3 | 2.2 | 4  | CS28492 | 35.3 | 3.8 | 4  |
| CS76300 | 15.3 | 2.3 | 10 | CS28423 | 36.3 | 3.8 | 4  |
| CS76131 | 15.4 | 3.6 | 5  | CS28419 | 38.4 | 3.3 | 5  |
| CS76091 | 15.5 | 1.4 | 4  | CS28373 | 39.5 | 3.1 | 4  |
| CS76290 | 15.5 | 4.1 | 4  | CS76197 | 39.6 | 4.3 | 5  |
| CS28732 | 15.6 | 2.9 | 5  | CS28461 | 39.8 | 4.3 | 5  |
| CS76150 | 15.6 | 1.8 | 5  | CS28575 | 40.0 | 2.5 | 5  |
| CS76157 | 15.6 | 2.5 | 5  | CS28364 | 40.3 | 4.1 | 10 |
| CS76194 | 15.6 | 1.3 | 5  | CS22689 | 41.3 | 5.1 | 4  |
| CS76203 | 15.6 | 1.5 | 5  | CS28578 | 42.0 | 1.0 | 2  |
| CS28053 | 15.7 | 3.8 | 3  | CS28382 | 42.2 | 2.8 | 5  |

---
